# Supplementary material for: Long Noncoding RNA RC3H2 Facilitates Cell Proliferation and Invasion by Targeting MicroRNA-101-3p/EZH2 Axis in OSCC
Source: PubMed Central journal article supplement — Mol Ther Nucleic Acids. 2020 Feb 13;20:97–110. doi: 10.1016/j.omtn.2020.02.006 (PMC7066035; doi:10.1016/j.omtn.2020.02.006), 2020-02-13

OMTN, Volume 20

## Supplemental Information

### Long Noncoding RNA RC3H2 Facilitates Cell Proliferation and Invasion by Targeting MicroRNA-101-3p/EZH2 Axis in OSCC

Kun Wu, Yingying Jiang, Wenkai Zhou, Bolin Zhang, Yan Li, Fei Xie, Jianjun Zhang, Xu Wang, Ming Yan, Qin Xu, Zhenhu Ren, Wantao Chen, and Wei Cao

Supplementary table 1. Clinical characteristic of the oral squamous cell carcinoma (OSCC) patients used for microarray assay.

| NO. | Prior Radiotherapy | Age | Gender | Site    | Clinical stage | TNM classification | Perineural invasion |
|-----|--------------------|-----|--------|---------|----------------|--------------------|---------------------|
| 1   | No                 | 56  | Female | Gingiva | II             | T2N0M0             | No                  |
| 2   | No                 | 54  | Male   | Gingiva | III            | T3N0M0             | No                  |
| 3   | No                 | 58  | Male   | Tongue  | III            | T2N1M0             | No                  |
| 4   | No                 | 64  | Male   | Tongue  | II             | T2N0M0             | Yes                 |
| 5   | No                 | 57  | Female | Tongue  | IV             | T4N0M0             | No                  |

TNM: tumor, node, metastasis

Supplementary table 2. Associations between RC3H2, EZH2 and miR-101-3p levels and clinical parameters in patients with OSCC (n = 34)

| Group                      | RC3H2 expression<br>( $\Delta$ Ct Mean $\pm$ SD) | P<br>value | EZH2 expression<br>( $\Delta$ Ct Mean $\pm$ SD) | P<br>value | miR-101-3p expression<br>( $\Delta$ Ct Mean $\pm$ SD) | P<br>value |
|----------------------------|--------------------------------------------------|------------|-------------------------------------------------|------------|-------------------------------------------------------|------------|
| <b>Age(y)</b>              |                                                  | 0.3900     |                                                 | 0.5799     |                                                       | 0.9185     |
| ≥ 60                       | 0.1333 $\pm$ 0.02223                             |            | 4.176 $\pm$ 1.506                               |            | 3.472 $\pm$ 2.099                                     |            |
| < 60                       | 0.1072 $\pm$ 0.0173                              |            | 3.886 $\pm$ 0.9750                              |            | 3.394 $\pm$ 1.743                                     |            |
| <b>Gender</b>              |                                                  | 0.7831     |                                                 | 0.6250     |                                                       | 0.1812     |
| Male                       | 0.1253 $\pm$ 0.01934                             |            | 4.189 $\pm$ 1.209                               |            | 3.067 $\pm$ 1.959                                     |            |
| Female                     | 0.1167 $\pm$ 0.02324                             |            | 3.951 $\pm$ 1.595                               |            | 3.995 $\pm$ 1.936                                     |            |
| <b>Smoking history</b>     |                                                  | 0.3671     |                                                 | 0.3496     |                                                       | 0.7055     |
| Yes                        | 0.1385 $\pm$ 0.02915                             |            | 3.770 $\pm$ 1.369                               |            | 3.260 $\pm$ 1.684                                     |            |
| No                         | 0.1096 $\pm$ 0.01704                             |            | 4.245 $\pm$ 1.363                               |            | 3.540 $\pm$ 2.130                                     |            |
| <b>T stage</b>             |                                                  | 0.1280     |                                                 | 0.8423     |                                                       | 0.7201     |
| T1-T2                      | 0.1138 $\pm$ 0.01359                             |            | 4.073 $\pm$ 1.416                               |            | 3.404 $\pm$ 2.028                                     |            |
| T3-T4                      | 0.1829 $\pm$ 0.072                               |            | 4.221 $\pm$ 1.023                               |            | 3.789 $\pm$ 1.724                                     |            |
| <b>Lymph node status</b>   |                                                  | 0.8412     |                                                 | 0.7809     |                                                       | 0.3267     |
| pN positive                | 0.1245 $\pm$ 0.02071                             |            | 4.039 $\pm$ 1.551                               |            | 3.184 $\pm$ 2.067                                     |            |
| pN negative                | 0.1182 $\pm$ 0.01917                             |            | 4.175 $\pm$ 1.042                               |            | 3.878 $\pm$ 1.812                                     |            |
| <b>TNM stage</b>           |                                                  | 0.6554     |                                                 | 0.9483     |                                                       | 0.5182     |
| I-II                       | 0.1101 $\pm$ 0.01904                             |            | 4.112 $\pm$ 1.062                               |            | 3.751 $\pm$ 1.831                                     |            |
| III-IV                     | 0.1245 $\pm$ 0.02071                             |            | 4.079 $\pm$ 1.526                               |            | 3.284 $\pm$ 2.072                                     |            |
| <b>Perineural invasion</b> |                                                  | 0.5749     |                                                 | 0.2179     |                                                       | 0.2142     |
| Yes                        | 0.1034 $\pm$ 0.01763                             |            | 4.616 $\pm$ 0.8577                              |            | 4.216 $\pm$ 1.385                                     |            |
| No                         | 0.1241 $\pm$ 0.01853                             |            | 3.929 $\pm$ 1.460                               |            | 3.213 $\pm$ 2.090                                     |            |
| <b>ECS</b>                 |                                                  | 0.5775     |                                                 | 0.9643     |                                                       | 0.0524     |
| Yes                        | 0.1018 $\pm$ 0.03633                             |            | 4.114 $\pm$ 0.9345                              |            | 4.859 $\pm$ 1.003                                     |            |
| No                         | 0.1236 $\pm$ 0.01662                             |            | 4.086 $\pm$ 1.452                               |            | 3.147 $\pm$ 2.011                                     |            |
| <b>Prior Radiotherapy</b>  |                                                  | 0.6388     |                                                 | 0.2893     |                                                       | 0.2659     |
| Yes                        | 0.09724 $\pm$ 0.03292                            |            | 4.899 $\pm$ 0.9517                              |            | 2.221 $\pm$ 3.641                                     |            |
| No                         | 0.1219 $\pm$ 0.01621                             |            | 4.013 $\pm$ 1.383                               |            | 3.568 $\pm$ 1.801                                     |            |

Abbreviations: SD, standard deviation; pN, lymph node-metastasis stage. ECS, extracapsular spread of metastatic lymph nodes.

$\Delta$ Ct indicates the difference in the cycle number at which a sample's fluorescent signal passes a given threshold above baseline (Ct) derived from a specific gene compared with that of GAPDH in tumor tissues.

Supplementary table 3. Sequence of qRT-PCR

| Primers   | Forward                 | Reverse                  |
|-----------|-------------------------|--------------------------|
| RC3H2     | CAACCGATTGTGAAGCTCTAGTG | CTTAGAGATGGTGCCTGCTTTTTA |
| GAPDH     | GAACGGGAAGCTCACTGG      | GAACGGGAAGCTCACTGG       |
| EZH2      | AATCAGAGTACATGCGACTGAGA | GCTGTATCCTTCGCTGTTTCC    |
| U6        | CTCGCTTCGGCAGCACATATACT | ATTTGCGTGTTCATCCTTGCGCA  |
| miR-101-3 | GCCGAGTACAGTACTGTGA     | CTCAACTGGTGTCTGTGGA      |

P

Supplementary Figure 1

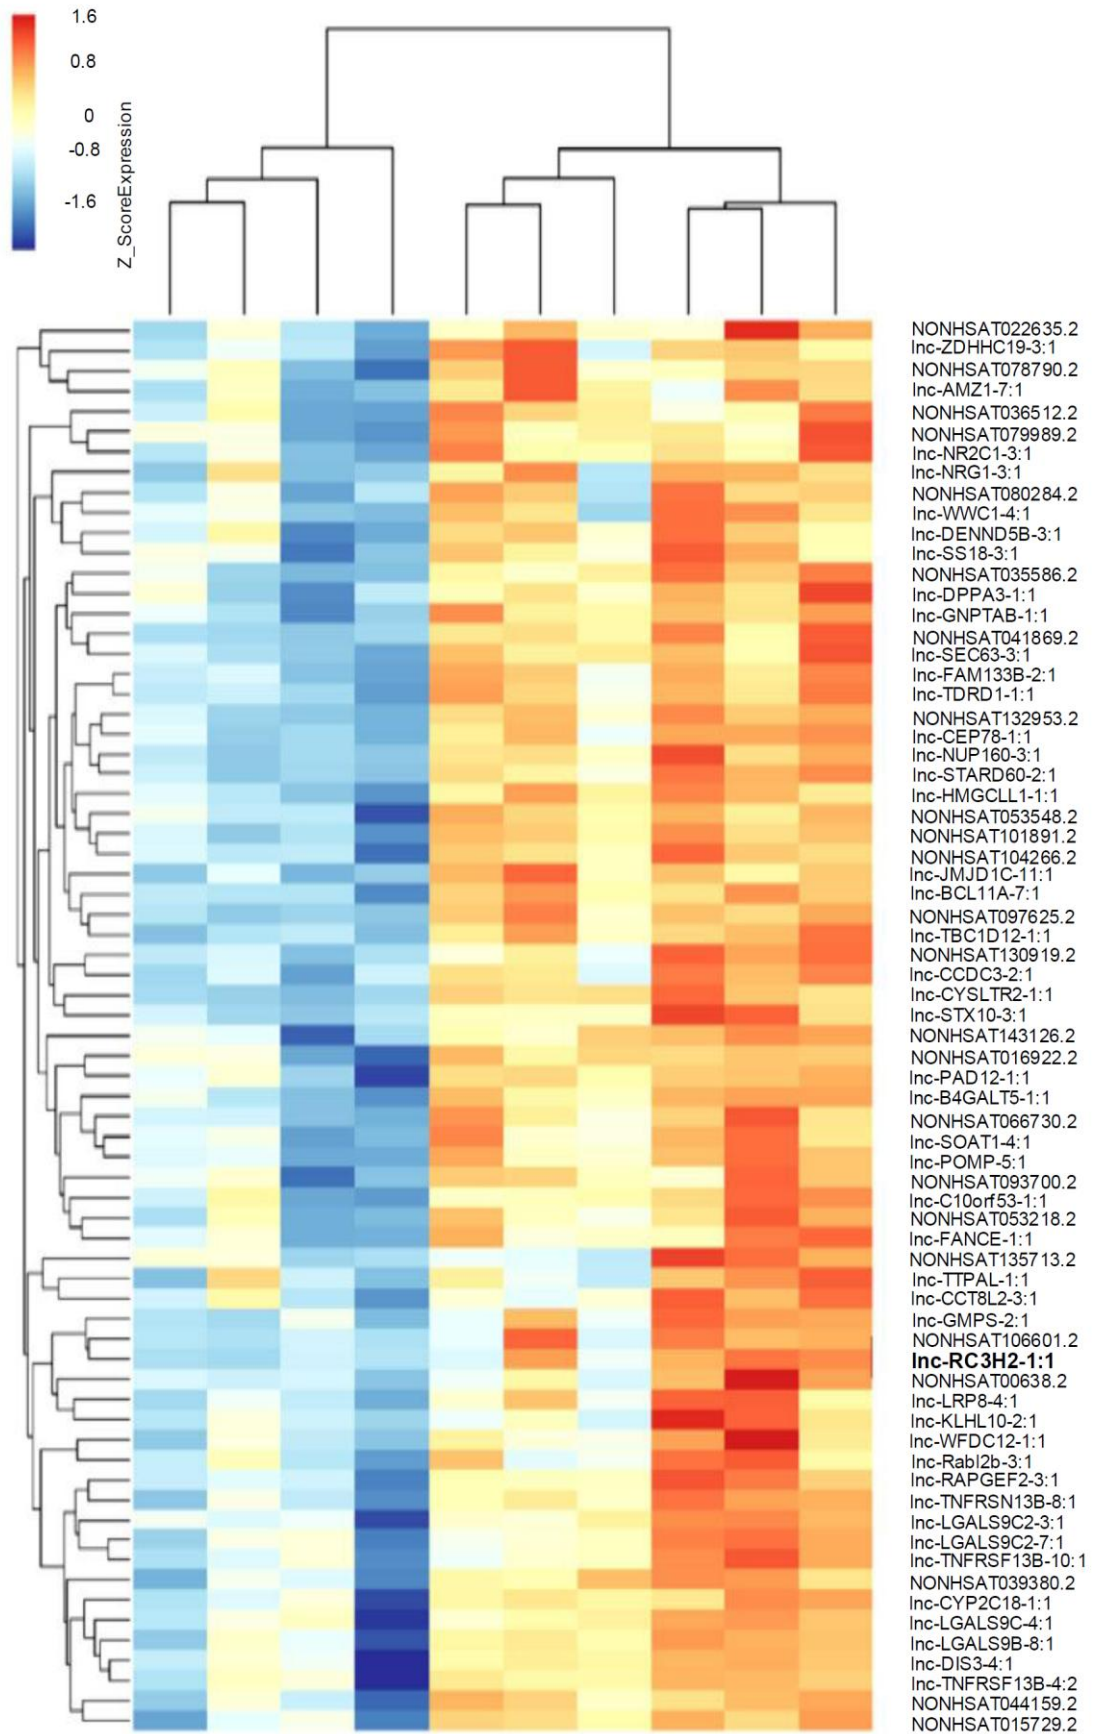

Supplementary Figure 2

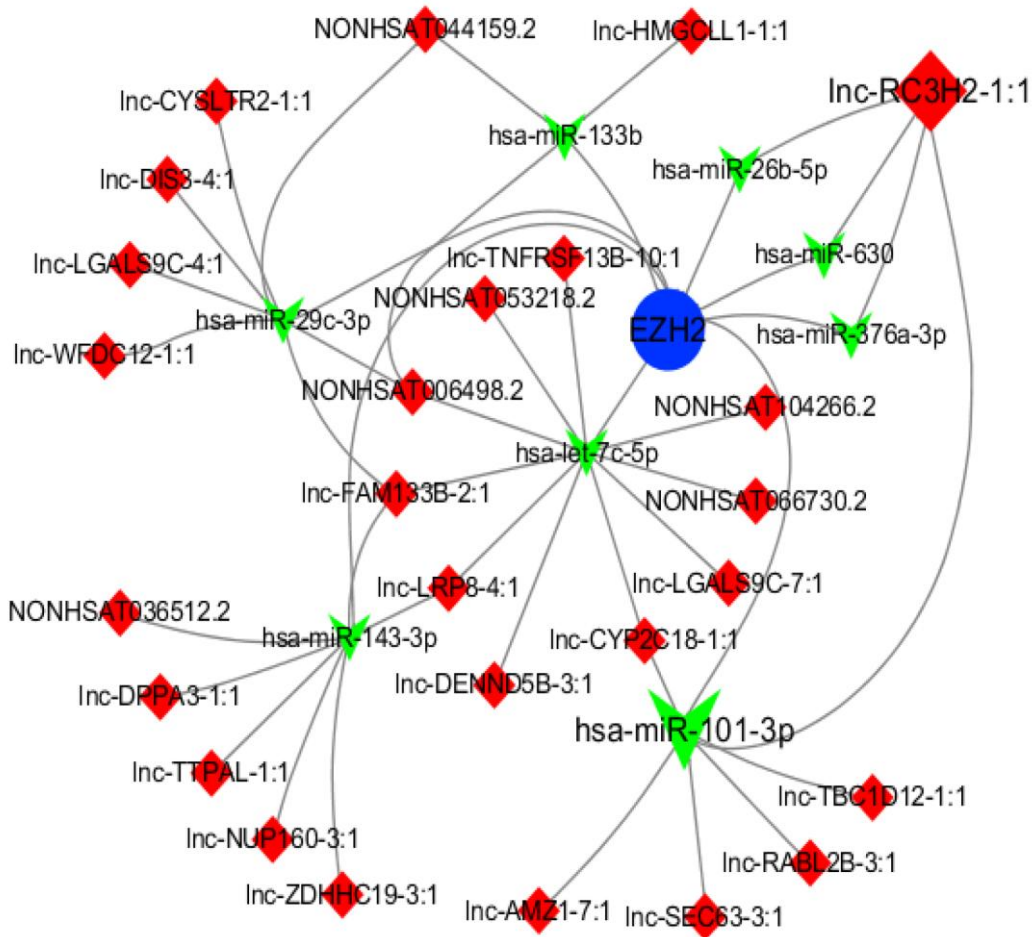

Supplementary Figure 3

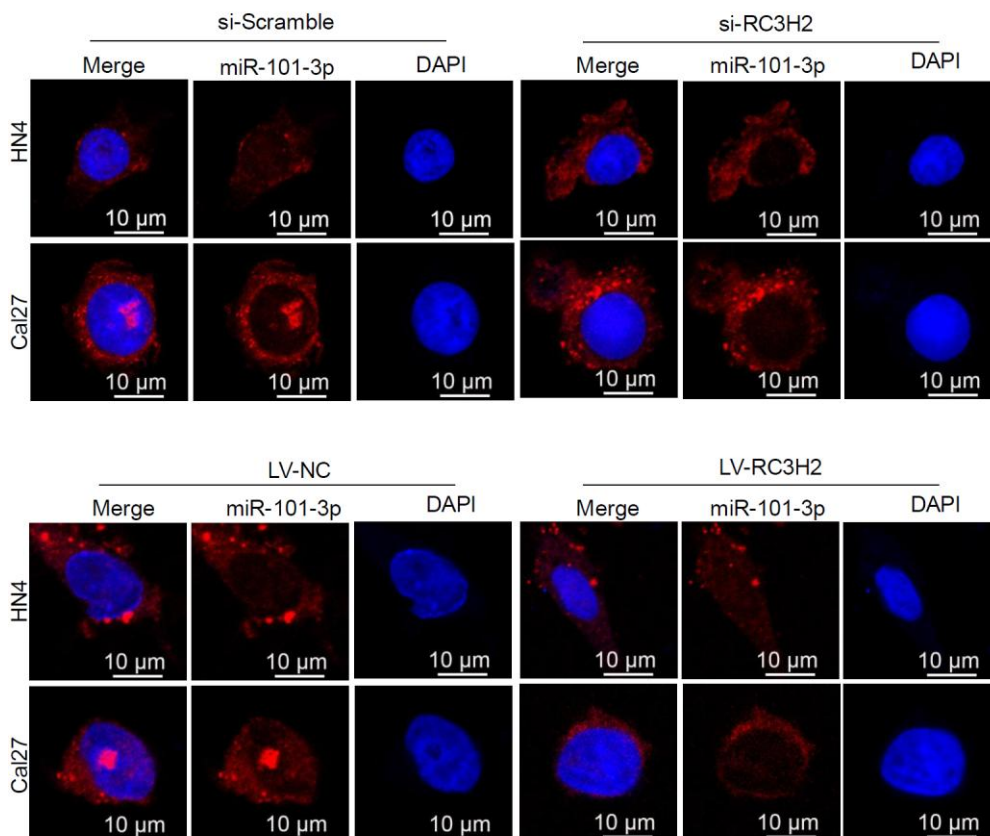

Supplementary Figure 4

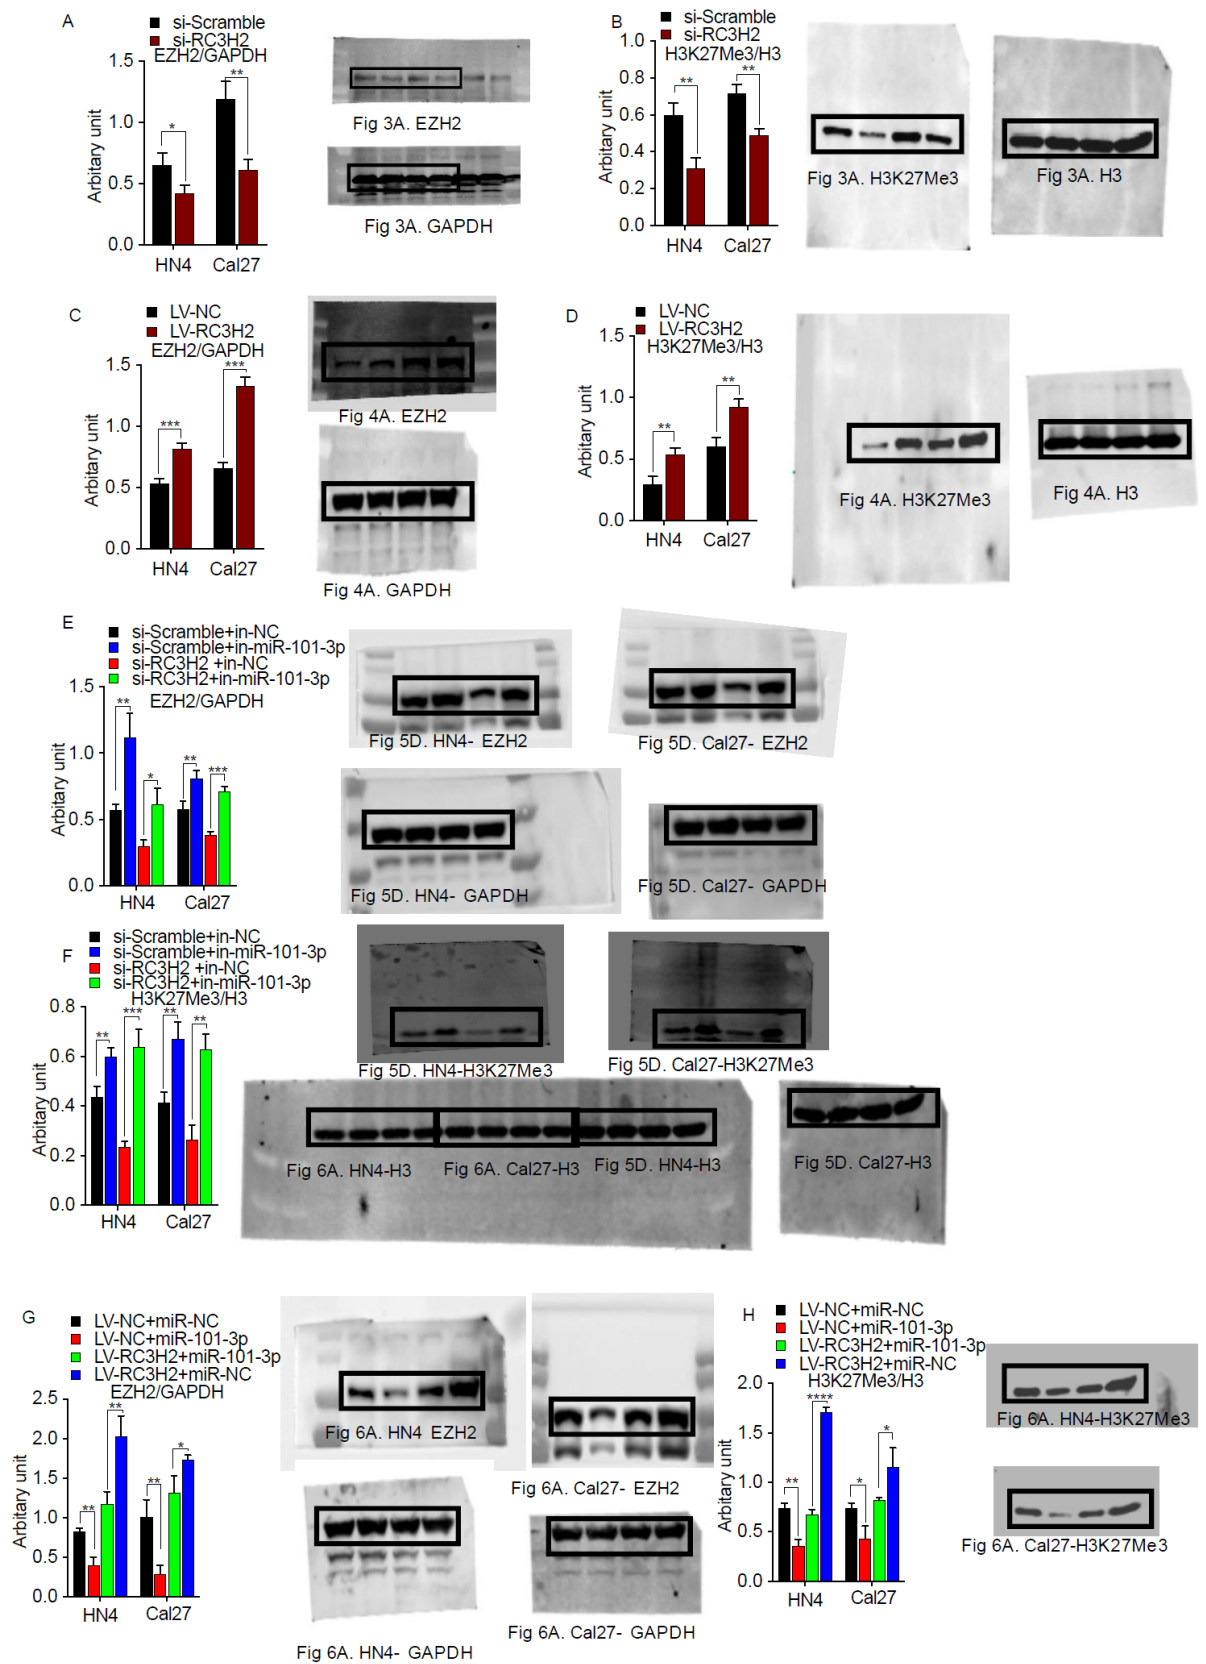

Supplementary Figure 5

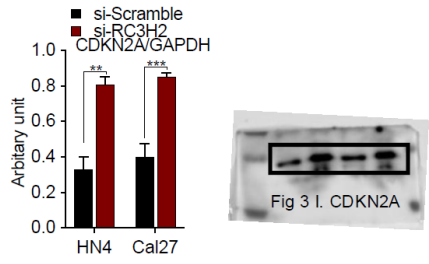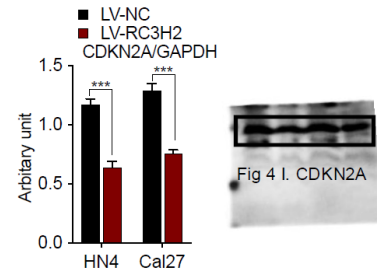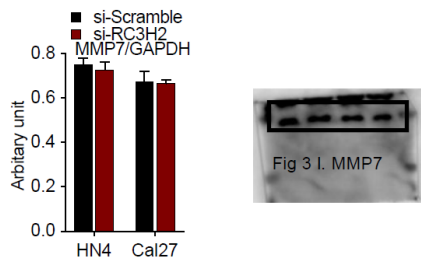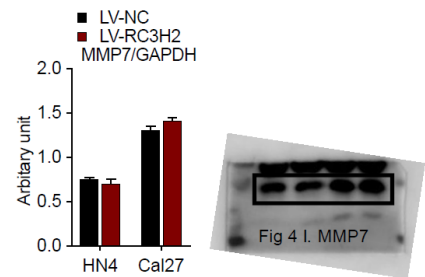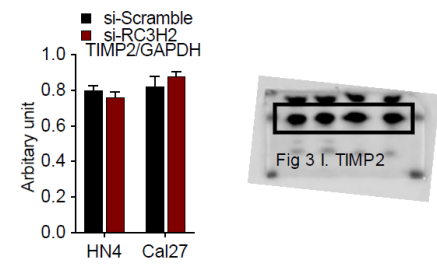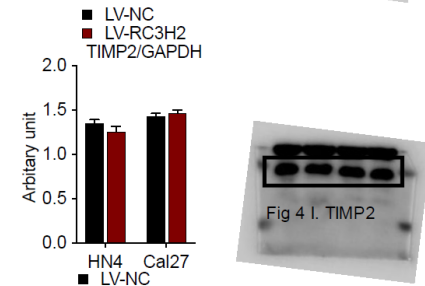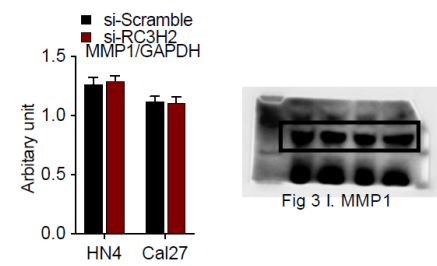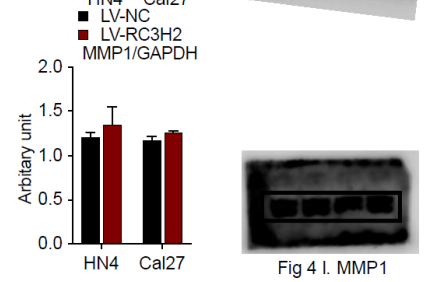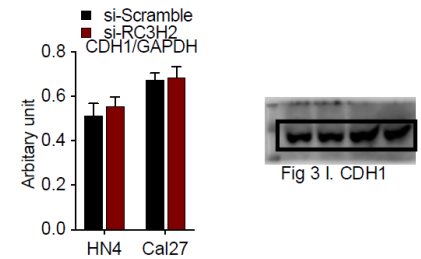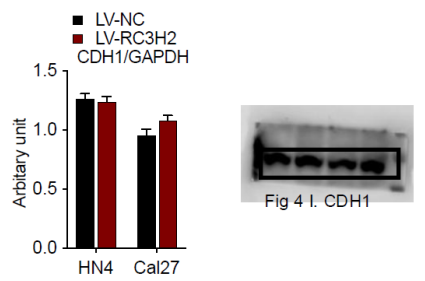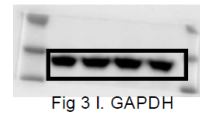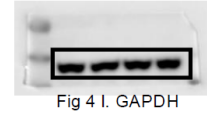

Supplement: mmc1.pdf [file mmc1.pdf]
